# Supplementary material for: How clustered protocadherin binding specificity is tuned for neuronal self-/nonself-recognition
Source: eLife. 2022 Mar 7;11:e72416. doi: 10.7554/eLife.72416 (PMC8901172; doi:10.7554/eLife.72416)
Supplement: Figure 2—source data 1. [file elife-72416-fig2-data1.docx]

| Protein | Oligomeric State | Dissociation Constant,  KD (mM) |
| --- | --- | --- |
|  |  |  |
| *Trans-interacting fragments* |  |  |
| 41–5 | Dimer | 5.0 ± 0.80 |
| 7*1–5 | Dimer | 2.91 ± 0.55 |
| 121–5 | Dimer | 34 ± 2.8 |
| 6*1–4 | Dimer | 16.3 ± 2.1 |
| 8*1–4 | Dimer | 24.0 ± 0.43 |
| A1*1–4 | Dimer | 13.3 ± 0.93 |
| A4*1–4 | Dimer | 45.3 ± 1.52 |
| A8*1–4 | Dimer | 30 ± 1.5 |
| A9*1–5 | Dimer | 8.61 ± 0.35 |
| B2*1–5 | Dimer | 21.8 ± 0.21 |
| B41–5 | Dimer | 38 ± 0.33 |
| B5* 1–4 | Dimer | 79.1 ± 4.3 |
| B51–4-AVI | Dimer | 50 ± 0.4 |
| C2*1–4 | Dimer | 20.6 ± 1.19 |
| C3*1–4 | Dimer | 115 ± 1.49 (Ki/KD = 1.57) |
| C41–4 | Monomer / Very weak dimer | > 500† |
| C5*1–5 | Dimer | 100 ± 4.33 |
|  |  |  |
| *Trans mutants* |  |  |
| 71–5 L301R | Weakly dimeric | 490 ± 57 |
| A81–4 I116R* | Monomer | N/A |
| C2*1–3 | Dimer | 242 ± 0.1 (Ki/KD = 1.48) |
| 1–4 R41N | Dimer | 160 ± 0.38 |
| 1–4 S117I | Dimer | 72 ± 34 |
| 1–4 L125P | Dimer | 150 ± 20 |
| 1–4 E369K | Dimer | 23 ± 2.8 |
| 1–4 Y371F | Dimer | 39 ± 5.6 |
| 1–4 R41N/S117I | Precipitate | N/A |
| 1–4 R41N/E369K | Dimer | 41 ± 0.69 |
| 1–4 S117I/L125P | Dimer | 68 ± 5.1 |
| 1–4 R41N/S117I/L125P | Weak dimer | 350 ± 11 |
| 1–4 R41N/S117I/E369K | Dimer | 32 ± 0.95 |
| 1–4 R41N/S117I/Y371F | Dimer | 18 ± 0.11 |
| 1–4 R41N/S117I/L125P/E369K/Y371F | Dimer | 63 ± 11 |

#### Figure 2—source data 1. Sedimentation equilibrium analytical ultracentrifugation data for *trans* SPR reagents

* Previously published data (Rubinstein et al., 2015; Goodman et al., 2016a; Goodman et al., 2016c)

† Dissociation constants larger than 500 mM cannot be accurately determined.
